# Supplementary material for: Compounds from plantar foot sweat, nesting material, and urine show strain patterns associated with agonistic and affiliative behaviors in group housed male mice, Mus musculus
Source: PLoS One. 2021 May 14;16(5):e0251416. doi: 10.1371/journal.pone.0251416 (PMC8121354; doi:10.1371/journal.pone.0251416)
Supplement: S5 Table — (XLSX) [file pone.0251416.s007.xlsx]

## Sheet: Sheet1
S5 Table Calculated proportion nest GC-MS data. (raw values/ total sample peak area)
Set Number			1	1	1	1	1	1	2	2	2	2	2	2	3	3	3	3	3	3	4	4	4	4	4	4
Sample ID			cage 1 - nest	cage 2 - nest	cage 3 - nest	cage 4 - nest	cage 5 - nest	cage 6 - nest	cage 7 - nest	cage 8 - nest	cage 9 - nest	cage 10 - nest	cage 11 - nest	cage 12 - nest	cage 13 - nest	cage 14 - nest	cage 15 - nest	cage 16 - nest	cage 17 - nest	cage 18 - nest	cage 19 - nest	cage 20 - nest	cage 21 - nest	cage 22 - nest	cage 23 - nest	cage 24 - nest
Compounds	Rt (min)	m/z
acetic acid	3.44	60	0.503744	0.0173378	0.0518305	0.399957	0.034964	0.132067	0.0243528	0.151039	0.403649	0.0707928	0.0711473	0.0348334	0.0868861	0.051427	0.170848	0.0521471	0.167035	0.0153565	0.242085	0.0179687	0.139447	0.0131692	0.0195058	0.0780781
hexadecanoic acid	72.12	60	0.0114024	0	0	0	0	0	0.00344569	0.0172106	0	0.00521959	0.0601402	0.00765076	0	0.00421597	0	0	0	0.00688029	0	0	0.0519211	0.0128798	0.00581674	0
octadecanoic acid	76.41	60	0.0106694	0	0	0	0	0	0.00330027	0.0243314	0	0.00531419	0.0416788	0.00689378	0	0.00249596	0	0	0	0.00397843	0	0	0.0468692	0.0156227	0.00502793	0
geranylacetone	43.93	69	0.0051352	0.00223129	0.00677003	0.0319153	0.00456726	0.0172416	0.00465711	0.0175773	0.00385917	0.00903134	0.00818411	0.00687256	0.00725557	0.00380677	0.0192607	0.00766167	0.0224986	0.00393256	0.0179317	0.00257649	0.0161919	0.00748632	0.0042213	0.0304898
β-farnesene	44.26	69	0.00277318	0	0	0	0	0	0	0	0.00056333	0.00422353	0	0	0	0	0	0	0	0.00119474	0	0	0	0	0	0
*MW 152 compound	41.38	70	0.122842	0	0.00221701	0.0369795	0.00304579	0.0497684	0	0.0263541	0	0.00486624	0.00129223	0	0.000525605	0.00209355	0.0183401	0.00228191	0.0205066	0	0.0131925	0.000988047	0.0555987	0.000620715	0.00114447	0
*2-hydroxybenzaldehyde	17.17	122	0.0500205	0.013713	0.135613	0.298507	0.0228007	0.279698	0.00767517	0.129026	0.0210177	0.0344838	0.0302339	0.0261354	0.00481666	0.00513116	0.0172402	0.00350243	0.00688544	0.00610052	0.0113503	0.00116114	0.00492797	0.00548158	0.00132407	0.00572726
2-furanmethanol	7.83	98	0.137427	0.00648442	0	0	0	0.0729786	0	0.0112135	0	0.00271552	0.020818	0	0	0	0	0	0.0129073	0.00581992	0	0	0.0706248	0.0267662	0.00576037	0
*1,2-cyclopentadione	10.85	98	0.119302	0.000311715	0.00299985	0.0281033	0.0117135	0.0773367	0	0.0336878	0.000603189	0.00519177	0.00808444	0.000391089	0.00139049	0.00292554	0.00847662	0.035803	0.026897	0.00294638	0.00900299	0.00496728	0.0633427	0.0172752	0.00732959	0
dehydrobrevicomin	17.6	111	0.00765509	0.0121162	0.0180179	0.0603803	0.0218528	0.00566481	0.00820755	0.0605742	0.0187733	0.0185579	0.0123634	0.0386728	0.0847893	0.00436539	0.055917	0.0335363	0.0325159	0.00641621	0.0384187	0.046467	0.00925895	0.0131063	0.0216047	0.00834305
2-isopropylthiazole	15.57	114	0	0.000282392	0.000923129	0.00202733	0.000753193	0.000178703	0.00036934	0.00111177	0.000366696	0.000698357	0.000495176	0.00111586	0.00165635	0.000237541	0.00176706	0.00104971	0.00193322	0.000239866	0.00206504	0.000783766	0.000642044	0	0.000628607	0.0016432
2-sec-butylthiazoline	21.2	115	0.0117147	0.0382326	0.104406	0.12908	0.0643473	0.0420729	0.0436479	0.128813	0.0844659	0.100305	0.0622975	0.131804	0.143746	0.0201171	0.16469	0.110866	0.180035	0.050558	0.159335	0.0797343	0.0893342	0.0398935	0.0909244	0.123896
*5-ethylthiazoline	26.64	117	0	0.0286014	0	0	0	0	0.657	0.186631	0.0458494	0.411855	0.602801	0.176656	0.0203123	0.796335	0.2452	0.0180809	0.0271503	0.713845	0.0345709	0.00862918	0.0365007	0.561738	0.0157093	0.436302
5,5-Dimethyl-2-ethyl-4,5-dihydrofuran	5.56	126	0	0.468459	0.470777	0	0.455193	0.201062	0.143444	0.19898	0.234547	0.209265	0.051828	0.517253	0.554352	0.0632922	0.189379	0.549561	0.32365	0.113394	0.292716	0.50117	0.24793	0.200885	0.56361	0.214564
Z-5,5-Dimethyl-2-ethylidenetetrahydrofuran	7.98	126	0	0.238566	0.116857	0	0.126802	0.0585658	0.0530804	0	0.0266324	0.0601283	0.00992488	0.0249276	0.026842	0.027009	0.0393942	0.0784788	0.00354635	0.0359313	0	0.141107	0.0866759	0.0550633	0.156509	0.0543673
E-5,5-Dimethyl-2-ethylidenetetrahydrofuran	9.38	126	0	0.0641394	0.0302992	0	0.0230797	0.0133427	0.0123779	0	0.00635872	0.0181601	0.00100032	0.00717218	0.00942474	0.00725188	0.00931353	0.0268091	0.00454808	0.00980914	0	0.0500226	0.0179885	0.0158408	0.0405992	0.0155886
6-hydroxy-6-methyl-3-heptanone	11.47	127	0.000646237	0.109525	0.0592894	0.0130499	0.230881	0.0467594	0.0351642	0.0134491	0.153314	0.0366457	0.00462426	0.0160758	0.0580029	0.00838949	0.0601733	0.078968	0.162291	0.0228048	0.179332	0.144424	0.0560831	0.0118649	0.0590694	0.0310001
hexadecanol	67.92	55	0.0166677	0	0	0	0	0.00326327	0.00327809	0	0	0.0025458	0.013086	0.00354632	0	0.000906697	0	0.00125404	0.00759932	0.000792448	0	0	0.00666261	0.00230587	0.00121461	0
